# Supplementary material for: Transcriptome analysis of ovary culture-induced embryogenesis in cucumber ( Cucumis sativus L.)
Source: PeerJ journal article supplement (doi:10.7717/peerj.12145), 2021-12-15
Supplement: Table_S1.docx [file Table_S1.docx]

**Table** **S1****Primers for Real-time quantitative PCR**

| **Primer name**  **Csa1M006300.1-F** | **Primer sequence**  **ATGGAAGGAGAAAATGGAGG** |
| --- | --- |
| Csa1M006300.1-F | ATGGAAGGAGAAAATGGAGG |
| Csa1M006300.1-R | TCGTAACGACGGTGGTGAT |
| Csa1M006320.1-F | AGGGGATTTTGGGGAAGC |
| Csa1M006320.1-R | GGAGTGAAGTTGGTGTATGGGT |
| Csa3M389850.1-F | TTTTTATCAATCCACAGTGCGC |
| Csa3M389850.1-R | AACTCTTCTCCGTCGTCTTCC |
| Csa5M223020.1-F | ACACACCAACTTTGAACGCT |
| Csa5M223020.1-R | TGATACAACCACCACAGGAAC |
| Csa5M434550.1-F | CCATGTTCTTGCTGTTGATGA |
| Csa5M434550.1-R | TTTGGAGTCCGTTTGCTGA |
| Csa5M623800.1-F | GCTTTCATGTTTTGGCTGTT |
| Csa5M623800.1-R | GGTTGGTTCCATTTCTTTCTCT |
| Csa6M067360.1-F | TGTCTGTATAGCCATGCGAAG |
| Csa6M067360.1-R | CACCAGCAGCCACAATTTG |
| Csa6M383530.1-F | ATCCCTCACCCGTTGTGCT |
| Csa6M383530.1-R | TGCTGCCTTTCTCTTGCTC |
| Csa7M420160.1-F | GATGCTTTGGTTGCTGCG |
| Csa7M420160.1-R | AGGGACTTCAATGGGCTG |
| Csa7M452370.1-F | GGAGAAAACACAGTTGCGTAG |
| Csa7M452370.1-R | ACTTATTGAAGTCCAGAGGGC |
| Actin-F | TTCTGGTGATGGTGTGAGTC |
| Actin-R | GGCAGTGGTGGTGAACATG |
