# Supplementary material for: Transcriptome analysis of ovary culture-induced embryogenesis in cucumber ( Cucumis sativus L.)
Source: PeerJ journal article supplement (doi:10.7717/peerj.12145), 2021-12-15
Supplement: Table_S2.docx [file Table_S2.docx]

**Table** **S2** **Statistics of RNA-Seq alignment**

| **Sample** | **Useful Reads** | **Map Events Count** | **Total Mapped Reads** | **Total Mapped %** | **Multiple Mapped Reads** | **Multiple Mapped %** | **Uniquely Mapped Reads** | **Uniquely Mapped%** |
| --- | --- | --- | --- | --- | --- | --- | --- | --- |
| T0-1 | 41673344 | 36604985 | 35632949 | 85.51 | 617132 | 1.73 | 35015817 | 98.27 |
| T0-2 | 42198976 | 37779045 | 36579034 | 86.68 | 788249 | 2.15 | 35790785 | 97.85 |
| T0-3 | 78665724 | 72218156 | 70180386 | 89.21 | 1194905 | 1.7 | 68985481 | 98.3 |
| T1-1 | 45673896 | 40099418 | 38687375 | 84.7 | 917446 | 2.37 | 37769929 | 97.63 |
| T1-2 | 43293860 | 42449714 | 35118978 | 81.12 | 5100302 | 14.52 | 30018676 | 85.48 |
| T1-3 | 63705852 | 57875503 | 55741835 | 87.5 | 1202224 | 2.16 | 54539611 | 97.84 |
| T2-1 | 46318998 | 44034728 | 36934437 | 79.74 | 5147203 | 13.94 | 31787234 | 86.06 |
| T2-2 | 44962902 | 39562001 | 37978096 | 84.47 | 1080496 | 2.85 | 36897600 | 97.15 |
| T2-3 | 73675242 | 67001538 | 64819229 | 87.98 | 1253675 | 1.93 | 63565554 | 98.07 |
| T3-1 | 47633120 | 44177375 | 38549386 | 80.93 | 3900153 | 10.12 | 34649233 | 89.88 |
| T3-2 | 45906844 | 40388661 | 38910603 | 84.76 | 975152 | 2.51 | 37935451 | 97.49 |
| T3-3 | 84427414 | 76920981 | 74761246 | 88.55 | 1271365 | 1.7 | 73489881 | 98.3 |
| T4-1 | 43355420 | 38781625 | 36124032 | 83.32 | 1812504 | 5.02 | 34311528 | 94.98 |
| T4-2 | 41886698 | 37500184 | 35248677 | 84.15 | 1601390 | 4.54 | 33647287 | 95.46 |
| T4-3 | 88295542 | 80868396 | 79033803 | 89.51 | 1048020 | 1.33 | 77985783 | 98.67 |
| T5-1 | 47764952 | 41104626 | 39991541 | 83.73 | 682277 | 1.71 | 39309264 | 98.29 |
| T5-2 | 45645876 | 40484944 | 38814801 | 85.03 | 1118719 | 2.88 | 37696082 | 97.12 |
| T5-3 | 88705538 | 81882854 | 79698168 | 89.85 | 1265485 | 1.59 | 78432683 | 98.41 |
