# Supplementary material for: Transcriptome analysis of ovary culture-induced embryogenesis in cucumber ( Cucumis sativus L.)
Source: PeerJ journal article supplement (doi:10.7717/peerj.12145), 2021-12-15
Supplement: Table_S3.docx [file Table_S3.docx]

**Table S3** **GO classification of common expressed genes in early stage of embryogenesis**

| **Catergory** | **Gene Ontology Term** | **The Number**  **of Genes** | **Corrected P-value******* |
| --- | --- | --- | --- |
| biological_process | GO:0055114 oxidation-reduction process | 459 | 0.00000277 |
| biological_process | GO:0009800 cinnamic acid biosynthetic process | 12 | 0.04372 |
| biological_process | GO:0009803 cinnamic acid metabolic process | 12 | 0.04372 |
| biological_process | GO:0044699 single-organism process | 1533 | 0.05011 |
| cellular_component | GO:0031224 intrinsic component of membrane | 1191 | 0.000000258 |
| cellular_component | GO:0016021 integral component of membrane | 1173 | 0.000000732 |
| cellular_component | GO:0044425 membrane part | 1225 | 0.00016 |
| cellular_component | GO:0031226 intrinsic component of plasma membrane | 77 | 0.00111 |
| cellular_component | GO:0005576 extracellular region | 124 | 0.00123 |
| cellular_component | GO:0044459 plasma membrane part | 89 | 0.00141 |
| cellular_component | GO:0005887 integral component of plasma membrane | 50 | 0.00277 |
| cellular_component | GO:0016020 membrane | 1494 | 0.00459 |
| cellular_component | GO:0071944 cell periphery | 341 | 0.00977 |
| molecular_function | GO:0016491 oxidoreductase activity | 478 | 0.000000892 |
| molecular_function | GO:0045548 phenylalanine ammonia-lyase activity | 12 | 0.01901 |
| molecular_function | GO:0046906 tetrapyrrole binding | 106 | 0.0259 |

*****: Corrected P value of all GO terms are lower than 0.05.
