# Supplementary material for: Transcriptome analysis of ovary culture-induced embryogenesis in cucumber ( Cucumis sativus L.)
Source: PeerJ journal article supplement (doi:10.7717/peerj.12145), 2021-12-15
Supplement: Table_S4.docx [file Table_S4.docx]

**Table S3** **Main differentially expressed genes in T0 vs T1**

| **Source** | **Principal DEGs** | **foldchane** | **pvalue** | **Description** |
| --- | --- | --- | --- | --- |
| Plant hormone signal transduction | Csa5M603910.1 | 5.18 | 1.17156E-42 | two-component response regulator ARR3-like |
| Csa6M067360.1 | 2.98 | 3.85857E-15 | histidine-containing phosphotransfer protein 1-like |
| Csa2M381840.1 | 4.62 | 6.46331E-23 | auxin-responsive protein IAA13-like |
| Csa3M017090.1 | 2.61 | 6.89182E-14 | serine/threonine-protein kinase SAPK3-like |
| Csa3M810480.1 | 26.00 | 2.99442E-06 | transcription factor HBP-1b(c1)-like |
| Csa7M238400.1 | 9.59 | 1.01899E-16 | auxin-induced protein X15-like |
| Csa6M147590.1 | Inf | 0.007140454 | uncharacterized protein LOC101212725 |
| Csa6M137590.1 | 2.22 | 0.000221006 | uncharacterized protein LOC101219677 |
| Csa5M223020.1 | 464.37 | 5.19269E-13 | two-component response regulator ARR17-like |
| CsaUNG009930 | 62.95 | 5.73407E-16 | EIN3-binding F-box protein 1-like |
| Csa7M008430.1 | 4.63 | 0.01930502 | auxin-induced protein 15A-like |
| Csa5M256680.1 | 3.37 | 1.62646E-27 | histidine kinase 4-like |
| Csa3M516530.1 | 21.69 | 2.25022E-05 | auxin-induced protein AUX22-like |
| Csa1M051690.1 | 8.04 | 3.4075E-09 | uncharacterized protein LOC101219975 |
| Csa6M092560.1 | 3.97 | 6.89884E-14 | uncharacterized protein LOC101219164 |
| Csa7M009140.1 | 8.14 | 9.48512E-20 | auxin-induced protein 15A-like |
| Csa3M171820.1 | 8.75 | 4.05928E-28 | uncharacterized LOC101208334 |
| Csa4M436980.1 | 21.64 | 4.4778E-124 | two-component response regulator ARR9-like |
| Csa5M549170.1 | 2.88 | 1.14973E-16 | histidine kinase 4-like |
| Csa6M007440.1 | 14.71 | 3.54727E-20 | auxin-induced protein 6B-like |
| Csa6M152350.1 | 5.46 | 9.65049E-25 | TGACG-sequence-specific DNA-binding protein TGA-2.1-like |
| Csa7M327730.1 | 2.09 | 1.45073E-09 | abscisic acid receptor PYL8-like |
| Csa6M383530.1 | 42.70 | 2.6238E-167 | two-component response regulator ARR9-like |
| Csa3M389850.1 | 11.90 | 2.23315E-39 | ethylene-responsive transcription factor 1B-like |
| Csa5M623800.1 | 21.22 | 0.004734354 | two-component response regulator ARR9-like |
| Csa5M434550.1 | 15.32 | 7.17842E-05 | two-component response regulator ARR9-like |
| Csa6M012800.1 | 11.92 | 1.01977E-21 | abscisic acid receptor PYL4-like |
| Csa3M822100.1 | 16.75 | 3.04222E-55 | two-component response regulator ARR9-like |
| Csa3M902310.1 | 2.70 | 0.00876473 | abscisic acid receptor PYR1-like |
| Csa2M373410.1 | 2.66 | 8.63109E-13 | histidine-containing phosphotransfer protein 4-like |
| Csa1M006300.1 | 4.75 | 7.38763E-12 | two-component response regulator ARR5-like |
| Csa5M217670.1 | 18.07 | 3.36289E-23 | abscisic acid receptor PYL4-like |
| Csa1M600830.1 | 6.38 | 4.70961E-53 | ABSCISIC ACID-INSENSITIVE 5-like protein 2-like |
| Csa4M457190.1 | 2.61 | 0.004920908 | serine/threonine-protein kinase SRK2B-like |
| Csa5M139540.1 | 2.04 | 6.50965E-07 | abscisic acid receptor PYL8-like |
| Csa2M008740.1 | 2.41 | 5.21888E-10 | two-component response regulator ARR12-like |
| Csa5M624430.1 | 2.59 | 1.24399E-15 | transcription factor HBP-1b(c1)-like |
| Csa6M011040.1 | 2.64 | 0.000929688 | auxin transporter-like protein 1-like |
| Csa4M454150.1 | 4.60 | 3.66973E-32 | serine/threonine-protein kinase SRK2H-like |
| Csa6M125240.1 | 4.65 | 1.18729E-28 | indole-3-acetic acid-amido synthetase GH3.6-like |
| Csa3M431430.1 | 17.91 | 9.60627E-19 | indole-3-acetic acid-amido synthetase GH3.6-like |
| Csa2M356070.1 | 5.03 | 2.68263E-28 | cyclin-D3-2-like |
| Csa7M452370.1 | 2.77 | 4.43827E-05 | histidine-containing phosphotransfer protein 4-like |
| plant-pathogen interaction pathway | Csa5M529950.1 | 6.09 | 3.90426E-26 | respiratory burst oxidase homolog protein E-like |
| Csa3M183950.1 | 0.00 | 2.78353E-39 | heat shock protein 83-like |
| Csa3M167380.1 | 3.40 | 1.66063E-26 | calmodulin-1-like |
| Csa7M274170.1 | 2.75 | 2.64089E-17 | calcium-dependent protein kinase 11-like |
| Csa3M576840.1 | 7.73 | 2.63425E-23 | cyclic nucleotide-gated ion channel 1-like |
| Csa2M075440.1 | 2.11 | 0.000814062 | disease resistance protein At4g27190-like |
| Csa1M470320.1 | 4.97 | 6.37293E-06 | probable LRR receptor-like serine/threonine-protein kinase At3g47570-like |
| Csa1M569450.1 | 19.23 | 1.37934E-77 | respiratory burst oxidase homolog protein B-like |
| Csa6M439940.1 | 2.30 | 2.49905E-05 | LOW QUALITY PROTEIN: calcium-dependent protein kinase 8-like |
| Csa6M376250.1 | 5.32 | 1.38466E-26 | probable calcium-binding protein CML44-like |
| Csa3M607120.1 | 2.22 | 9.56709E-10 | cyclic nucleotide-gated ion channel 1-like |
| Csa3M130280.1 | 2.92 | 1.99603E-14 | uncharacterized protein LOC101211635 |
| Csa1M006320.1 | 2.09 | 0.000229952 | uncharacterized protein LOC101214385 |
| Csa1M005530.1 | 3.75 | 0.000828815 | probable cyclic nucleotide-gated ion channel 16-like |
| Csa3M119630.1 | 3.69 | 3.40279E-15 | cyclic nucleotide-gated ion channel 1-like |
| Csa7M420160.1 | 5.96 | 7.09983E-17 | LOW QUALITY PROTEIN: probable receptor-like protein kinase At2g47060-like |
| Csa4M050120.1 | Inf | 4.42237E-21 | WRKY transcription factor 22-like |
| Csa3M785400.1 | 2.71 | 1.31797E-06 | calcium-dependent protein kinase 20-like |
| Csa6M216960.1 | 88.53 | 6.12018E-73 | probable WRKY transcription factor 33-like |
| Embryogenesis-related transcription factors | Csa7M432080.1 | Inf | 7.864E-17 | ethylene-responsive transcription factor ERF003-like |
| Csa4M006210.1 | 247.66 | 4.3751E-08 | ethylene-responsive transcription factor ERF003-like, partial |
| Csa4M652640.1 | 130.95 | 5.12135E-61 | ethylene-responsive transcription factor ERF003-like |
| Csa2M177220.1 | 94.26 | 1.10176E-24 | ethylene-responsive transcription factor ERF098-like |
| Csa1M000550.1 | 80.49 | 2.1845E-126 | ethylene-responsive transcription factor ERF114-like |
| Csa2M382540.1 | 77.09 | 1.65606E-62 | ethylene-responsive transcription factor ERF003-like |
| Csa3M019400.1 | 60.57 | 1.57491E-30 | ethylene-responsive transcription factor ERF034-like |
| Csa6M518300.1 | 53.58 | 3.13368E-41 | ethylene-responsive transcription factor ERF091-like |
| Csa4M023020.1 | 43.73 | 3.5934E-126 | ethylene-responsive transcription factor ERF104-like |
| Csa4M007650.1 | 36.37 | 1.55308E-09 | ethylene-responsive transcription factor ERF021-like |
| Csa4M292470.1 | 27.18 | 1.56046E-18 | ethylene-responsive transcription factor RAP2-7-like |
| Csa5M155560.1 | 22.83 | 0.002310218 | ethylene-responsive transcription factor ERF026-like |
| Csa2M382550.1 | 16.71 | 9.09603E-54 | ethylene-responsive transcription factor ERF003-like |
| Csa3M827320.1 | 10.79 | 0.000142912 | AP2-like ethylene-responsive transcription factor BBM2-like |
| Csa4M641590.1 | 7.22 | 8.95204E-23 | ethylene-responsive transcription factor ERF011-like |
| Csa6M128610.1 | 6.12 | 3.3831E-09 | LOW QUALITY PROTEIN: ethylene-responsive transcription factor ERF054-like |
| Csa5M608380.1 | 4.79 | 1.74067E-37 | AP2/ERF and B3 domain-containing transcription repressor RAV2-like |
| Csa5M150420.1 | 4.63 | 3.54644E-06 | ethylene-responsive transcription factor ERF061-like |
| Csa3M827310.1 | 4.16 | 4.0999E-13 | AP2-like ethylene-responsive transcription factor BBM2-like |
| Csa6M500550.1 | 3.58 | 8.6132E-15 | ethylene-responsive transcription factor ERF060-like |
| Csa1M075030.1 | 3.19 | 3.30597E-11 | ethylene-responsive transcription factor 12-like |
| Csa5M165850.1 | 2.81 | 1.38012E-15 | ethylene-responsive transcription factor 2-like |
| Csa6M042450.1 | 2.70 | 4.3544E-06 | ethylene-responsive transcription factor CRF6-like |
| Csa6M104640.1 | 2.65 | 0.000145995 | ethylene-responsive transcription factor ERF039-like |
| Csa3M017320.1 | 2.50 | 1.00486E-14 | ethylene-responsive transcription factor 1A-like |
| Csa1M045480.1 | Inf | 2.73973E-51 | probable WRKY transcription factor 72-like |
| Csa4M050120.1 | Inf | 4.42237E-21 | WRKY transcription factor 22-like |
| Csa6M139770.1 | 4341.50 | 3.6572E-164 | probable WRKY transcription factor 71-like |
| Csa7M236280.1 | 207.36 | 1.72211E-29 | probable WRKY transcription factor 71-like |
| Csa2M406060.1 | 120.02 | 2.84323E-09 | probable WRKY transcription factor 45-like |
| Csa6M216960.1 | 88.53 | 6.12018E-73 | probable WRKY transcription factor 33-like |
| Csa2M382660.1 | 83.70 | 7.60182E-16 | probable WRKY transcription factor 60-like |
| Csa7M417820.1 | 44.16 | 1.38554E-98 | probable WRKY transcription factor 68-like |
| Csa1M009580.1 | 25.25 | 0.00150112 | probable WRKY transcription factor 72-like |
| Csa6M522650.1 | 18.45 | 3.45383E-60 | probable WRKY transcription factor 71-like |
| Csa3M567330.1 | 16.47 | 2.9615E-108 | probable WRKY transcription factor 75-like |
| Csa6M486880.1 | 6.68 | 2.11612E-06 | probable WRKY transcription factor 13-like |
| Csa3M727990.1 | 6.44 | 4.17078E-56 | probable WRKY transcription factor 70-like |
| Csa5M223070.1 | 5.76 | 2.07097E-50 | probable WRKY transcription factor 54-like |
| Csa4M012390.1 | 4.41 | 0.002977868 | probable WRKY transcription factor 75-like |
| Csa7M328830.1 | 3.74 | 7.72912E-28 | probable WRKY transcription factor 53-like |
| Csa6M513540.1 | 3.72 | 6.584E-11 | probable WRKY transcription factor 42-like |
| Csa6M491080.1 | 3.59 | 1.55754E-26 | probable WRKY transcription factor 15-like |
| Csa7M049170.1 | 2.60 | 1.75778E-16 | probable WRKY transcription factor 69-like |
| Csa6M513530.1 | 2.56 | 0.000345486 | WRKY transcription factor 6-like, partial |
| Csa1M361460.1 | Inf | 1.34826E-60 | transcription factor bHLH74-like |
| Csa5M157230.1 | Inf | 4.82851E-05 | transcription factor bHLH120-like |
| Csa7M071410.1 | Inf | 0.006884245 | transcription factor bHLH85-like |
| Csa7M452040.1 | 9.71 | 4.35523E-08 | transcription factor bHLH87-like |
| Csa1M570740.1 | 6.64 | 7.53552E-18 | transcription factor bHLH96-like |
| Csa7M360030.1 | 6.17 | 4.52656E-05 | transcription factor bHLH62-like |
| Csa6M497110.1 | 5.45 | 5.55438E-07 | transcription factor bHLH25-like |
| Csa2M353500.1 | 4.34 | 9.51169E-20 | transcription factor bHLH49-like |
| Csa1M612950.1 | 3.43 | 8.20655E-17 | transcription factor bHLH122-like |
| Csa1M477540.1 | 3.06 | 2.82665E-12 | putative transcription factor bHLH107-like |
| Csa4M011680.1 | 2.88 | 0.003293713 | transcription factor bHLH113-like |
| Csa1M425940.1 | 2.54 | 3.4597E-11 | transcription factor bHLH35-like |
| Csa7M069180.1 | 2.52 | 3.79536E-07 | transcription factor bHLH25-like |
| Csa1M555600.1 | 2.05 | 7.1479E-05 | transcription factor bHLH149-like |
| Csa6M011720.1 | 2.04 | 0.00243444 | transcription factor bHLH51-like |
| Csa4M017190.1 | 2.01 | 1.02841E-07 | transcription factor bHLH128-like |
| Csa7M413890.1 | Inf | 5.19613E-08 | transcription factor MYB75-like |
| Csa6M496950.1 | Inf | 1.10681E-05 | transcription factor MYB28-like |
| Csa6M496960.1 | Inf | 0.003535873 | PREDICTED: transcription factor MYB28-like |
| Csa6M499890.1 | Inf | 0.021704821 | transcription factor MYB39-like |
| Csa6M040640.1 | 142.13 | 3.0224E-128 | transcription factor MYB3-like |
| Csa7M045590.1 | 21.53 | 1.98732E-23 | transcription factor MYB86-like |
| Csa1M482740.1 | 12.05 | 5.34367E-23 | transcription factor MYB59-like |
| Csa3M168940.1 | 10.85 | 8.79818E-46 | transcription repressor MYB6-like |
| Csa3M696880.1 | 6.73 | 1.32056E-08 | transcription factor MYB23-like |
| Csa4M614170.1 | 6.21 | 1.69518E-32 | putative Myb family transcription factor At1g14600-like |
| Csa6M303240.1 | 3.12 | 0.000151126 | transcription factor MYB48-like |
| Csa1M004900.1 | 3.10 | 1.03699E-08 | transcription factor MYB98-like |
| Csa2M360620.1 | 2.52 | 0.003604977 | transcriptional activator Myb-like |
| Csa3M822450.1 | 2.55 | 0.00976665 | heat stress transcription factor B-3-like |
| Csa2M356690.1 | 5.74 | 1.05637E-11 | heat stress transcription factor B-4-like |
| Csa6M517310.1 | 3.99 | 2.16464E-15 | heat stress transcription factor B-2a-like |
| Csa1M629180.1 | 3.20 | 0.003211929 | heat stress transcription factor B-4b-like |
