# Supplementary material for: Transcriptome analysis of ovary culture-induced embryogenesis in cucumber ( Cucumis sativus L.)
Source: PeerJ journal article supplement (doi:10.7717/peerj.12145), 2021-12-15
Supplement: Table_S5.docx [file Table_S5.docx]

**Table S5** **GO** **classification of common expressed genes in morphogenesis stage**

| **Catergory** | **Gene Ontology Term** | **The Number**  **of Genes** | **Corrected P-value*** |
| --- | --- | --- | --- |
| biological_process | GO:0006928 movement of cell or subcellular component | 7 | 0.01719 |
| biological_process | GO:0007018 microtubule-based movement | 7 | 0.01719 |
| cellular_component | GO:0005874 microtubule | 7 | 0.03364 |
| cellular_component | GO:0099512 supramolecular fiber | 7 | 0.03709 |
| cellular_component | GO:0099513 polymeric cytoskeletal fiber | 7 | 0.03709 |
| molecular_function | GO:0032403 protein complex binding | 11 | 0.00058 |
| molecular_function | GO:0008017 microtubule binding | 9 | 0.00125 |
| molecular_function | GO:0046906 tetrapyrrole binding | 18 | 0.00164 |
| molecular_function | GO:0015631 tubulin binding | 9 | 0.00268 |
| molecular_function | GO:0003777 microtubule motor activity | 7 | 0.00648 |
| molecular_function | GO:0003774 motor activity | 7 | 0.01955 |
| molecular_function | GO:0044877 macromolecular complex binding | 12 | 0.02217 |
| molecular_function | GO:0020037 heme binding | 15 | 0.02437 |
| molecular_function | GO:0016491 oxidoreductase activity | 47 | 0.03163 |
| molecular_function | GO:0005506 iron ion binding | 14 | 0.03235 |
| molecular_function | GO:0016705 oxidoreductase activity, acting on  paired donors, with incorporation or reduction of molecular oxygen  acting on paired donors, with incorporation or paired donors, with incorporation or reduction of molecular oxygen | 14 | 0.04324 |

*****: Corrected P value of all GO terms are lower than 0.05.
